# Supplementary material for: Transcriptome and Degradome Profiling Reveals a Role of miR530 in the Circadian Regulation of Gene Expression in Kalanchoë marnieriana
Source: MDPI journal article supplement (doi:10.3390/cells10061526), 2021-06-17
Supplement: s1 [file s1]

## Supplementary information

### Supplementary figures

**Supple. Figure 1.** *K. marnieriana* is a constitutive CAM plants with enhanced leaf titratable acids under drought treatments. **A**, an overall morphology of a *K. marnieriana* plant maintained in a growth chamber. **B**, the phylogenetic relationship of closely related *K. marnieriana* plants based on ITS sequences analysis [1]. KM “BaiJiZhiWu” is the accession used in this study. **C**, the measurements of leaf titratable acid under regularly watering condition (CK), withhold watering for 10 days (D10) and withhold watering for 25 days (D25).

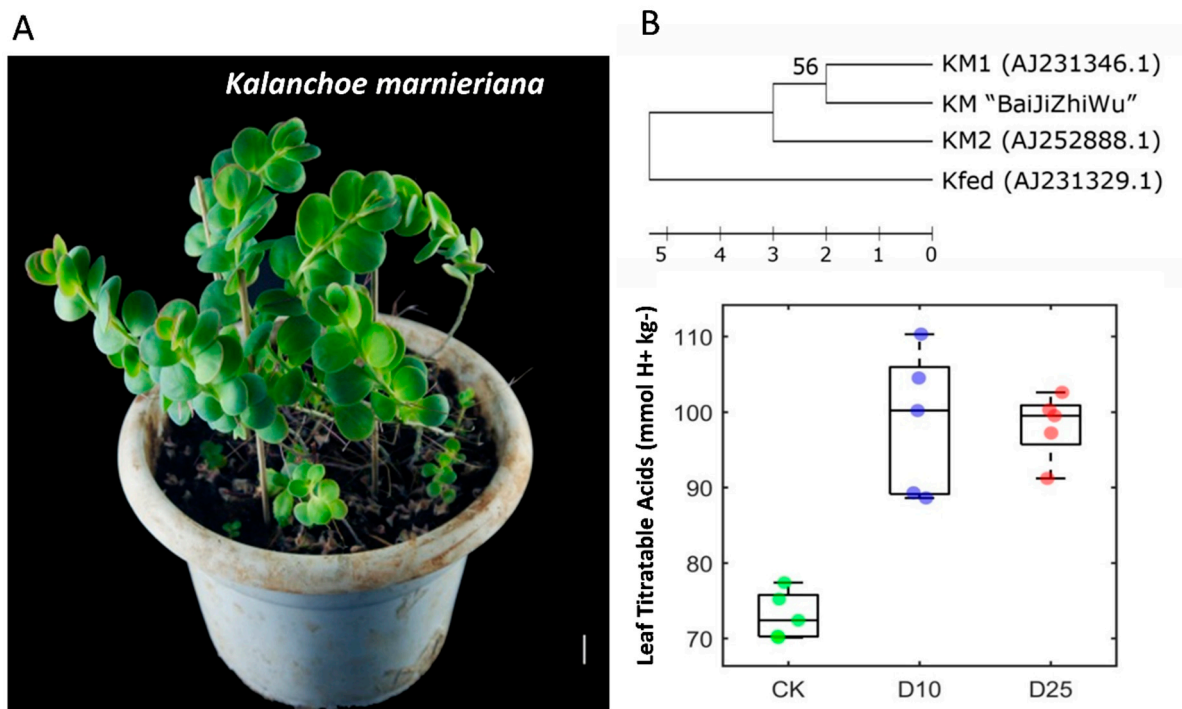

**Supple. Fig2. Diurnal expression of potential miRNA targets that are identified by the degradome analysis.** **A**, a heatmap plot of diel expression of targets. The groups of morning-specific and dawn-specific expression genes are highlighted by black boxes. **B**, The TZP-like genes (TZP1 and TZP2) are revealed as the morning-specific genes that are targeted by miR530. Kal-miR\_C1817 is revealed to target POF and MYB genes.

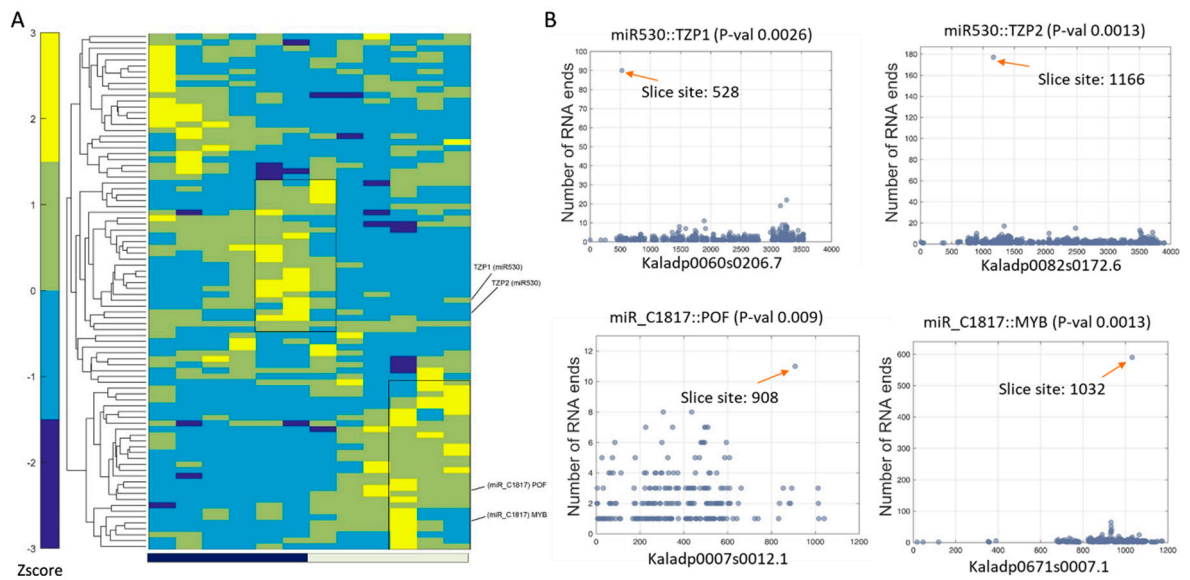

**Supple. Table S1. The primers used in this study.**

| <b>Primer name</b>    | <b>Sequences</b>            | <b>Usage</b>                  |
|-----------------------|-----------------------------|-------------------------------|
| <b>TEDI-F</b>         | TGTTGTTCTGCCACAGAAG         | Internal control realtime PCR |
| <b>TEDI-R</b>         | TAGAGGGTGAAGGTCCCAGA        | Internal control realtime PCR |
| <b>TZP1-F</b>         | TTAGCCGGTAAAAGCTACCATGTT    | realtime PCR                  |
| <b>TZP1-R</b>         | TGGAACCAGCTTGCTCATTTG       | realtime PCR                  |
| <b>TZP2-F</b>         | TTTATCATGTGGCGTACGTTGAT     | realtime PCR                  |
| <b>TZP2-R</b>         | AGAACAAGCTTGGCACCTTTAGA     | realtime PCR                  |
| <b>mi530-mature</b>   | TGCATTTGCACCTGCACCTTT       | realtime PCR                  |
| <b>pre-mi530+EX-F</b> | CTCGAGCTTACCCTCCTCCTTC      | miRNA over-expressor          |
| <b>pre-mi530+EX-R</b> | GAATTCCCACTGCACAGACAC       | miRNA over-expressor          |
| <b>TZP1-F</b>         | CTAGGTTAGGTGCAGGTGTAAATGCAA | Dual-Luciferase Reporters     |
| <b>TZP1-R</b>         | CCGGTTGCATTTACACCTGCACCTAAC | Dual-Luciferase Reporters     |
| <b>TZP2-F</b>         | CTAGGTCAGGCGCAGGTGCAAATGCAA | Dual-Luciferase Reporters     |
| <b>TZP2-R</b>         | CCGGTTGCATTTGCACCTGCGCCTGAC | Dual-Luciferase Reporters     |

**Supple. Table S2. The statistics of small RNA sequencing results in *Kalanchoë marianeria***

The number of reads were filtered using

|                       | Total     | Percentage | Unique    | Percentage |
|-----------------------|-----------|------------|-----------|------------|
| Raw reads             | 251741931 | 100.00%    | 106659931 | 100.00%    |
| 3ADT&length<br>filter | 34244478  | 13.60%     | 13432958  | 12.59%     |
| Junk reads            | 1116037   | 0.44%      | 710834    | 0.67%      |
| Rfam                  | 10230068  | 4.06%      | 158387    | 0.15%      |
| Repeats               | 118538    | 0.05%      | 3212      | 0.00%      |
| valid reads           | 206077270 | 81.86%     | 92355587  | 86.59%     |
| rRNA                  | 9146690   | 3.63%      | 126123    | 0.12%      |
| tRNA                  | 490550    | 0.19%      | 11605     | 0.01%      |
| snoRNA                | 63505     | 0.03%      | 4281      | 0.00%      |
| snRNA                 | 62392     | 0.02%      | 3979      | 0.00%      |
| other Rfam RNA        | 466931    | 0.19%      | 12399     | 0.01%      |

**Supple. Table 3. The predict miRNA targets in the diel transcriptome based on the degradome analysis.** The slice site and the alignment are identified by the CleaveLand 4.0 pipeline (<https://github.com/MikeAxtell/CleaveLand4>).

| Transcript Name       | Slice Site | Query(miRNA)           | Category | p-value | Arabidopsis-symbol                             |
|-----------------------|------------|------------------------|----------|---------|------------------------------------------------|
| Kaladp0078s<br>0017.1 | 869        | kal-miR164d            | 0        | 0.00043 | anac021,ANAC022,NAC1                           |
| Kaladp0002s<br>0088.1 | 1899       | mdm-miR160a            | 0        | 0.00043 | ARF16                                          |
| Kaladp0072s<br>0008.1 | 3436       | mdm-miR162a            | 0        | 0.00043 | ASU1,ATDCL1,CAF,DCL1,EMB60,EMB76,<br>SIN1,SUS1 |
| Kaladp0099s<br>0085.3 | 1725       | mdm-miR172i_R-1        | 0        | 0.00043 | RAP2.7,TOE1                                    |
| Kaladp0891s<br>0016.1 | 1750       | mdm-MIR172i-p5         | 0        | 0.00043 | AP2,FL1,FLO2                                   |
| Kaladp0024s<br>0700.1 | 699        | mdm-miR2111a           | 0        | 0.00043 |                                                |
| Kaladp0058s<br>0662.1 | 3179       | mdm-miR403a            | 0        | 0.00043 | AGO2                                           |
| Kaladp0007s<br>0012.1 | 908        | kal-miR_C1878_star     | 0        | 0.00086 |                                                |
| Kaladp0192s<br>0039.1 | 1060       | kal-miR164d            | 0        | 0.00086 | ANAC098,ATCUC2,CUC2                            |
| Kaladp0095s<br>0509.1 | 1300       | kal-miR166a            | 0        | 0.00086 | ATHB-15,ATHB15,CNA,ICU4                        |
| Kaladp0032s<br>0311.1 | 1525       | kal-miR172c            | 0        | 0.00086 | RAP2.7,TOE1                                    |
| Kaladp0381s<br>0002.1 | 300        | kal-miR858             | 0        | 0.00086 | AtMYB6,MYB6                                    |
| Kaladp0964s<br>0014.1 | 950        | mdm-miR159d            | 0        | 0.00086 | ATMYB65,MYB65                                  |
| Kaladp0002s<br>0088.2 | 1515       | mdm-miR160a            | 0        | 0.00086 | ARF16                                          |
| Kaladp0092s<br>0159.1 | 1341       | mdm-miR166a            | 0        | 0.00086 | ATHB-15,ATHB15,CNA,ICU4                        |
| Kaladp0053s<br>0463.1 | 686        | mdm-miR168a_1ss2C<br>T | 0        | 0.00086 | AGO1                                           |
| Kaladp0032s<br>0311.3 | 1495       | mdm-miR172a_R+1        | 0        | 0.00086 | RAP2.7,TOE1                                    |
| Kaladp0099s<br>0085.2 | 1728       | mdm-miR172i_R-1        | 0        | 0.00086 | RAP2.7,TOE1                                    |

|                       |      |                                    |   |         |                               |
|-----------------------|------|------------------------------------|---|---------|-------------------------------|
| Kaladp0099s<br>0085.1 | 1550 | mdm-MIR172i-<br>p5                 | 0 | 0.00086 | RAP2.7,TOE1                   |
| Kaladp0024s<br>0700.2 | 560  | mdm-miR2111a                       | 0 | 0.00086 |                               |
| Kaladp0094s<br>0012.1 | 1656 | mdm-<br>miR156t_L-<br>1_1ss15AT    | 1 | 0.001   |                               |
| Kaladp0671s<br>0007.1 | 1032 | kal-<br>miR_C1878_star             | 0 | 0.00129 | ATMYB66,MYB66,WER,WER1        |
| Kaladp0048s<br>0186.1 | 867  | kal-miR164d                        | 0 | 0.00129 | ANAC100,ATNAC5,NAC100         |
| Kaladp0099s<br>0085.4 | 1674 | mdm-MIR172i-<br>p5                 | 0 | 0.00129 | RAP2.7,TOE1                   |
| Kaladp0515s<br>0205.1 | 301  | mdm-MIR858-<br>p5_1ss17AG          | 0 | 0.00129 | ATMYB5,MYB5                   |
| Kaladp0082s<br>0172.6 | 1166 | ptc-<br>miR530a_R+1_1<br>ss20TG    | 0 | 0.00129 | TZP                           |
| Kaladp0674s<br>0167.1 | 889  | kal-miR164d                        | 0 | 0.00172 | ANAC079,ANAC080,ATNAC4,NAC080 |
| Kaladp0043s<br>0276.1 | 1291 | kal-miR166a                        | 0 | 0.00172 | ATHB-15,ATHB15,CNA,ICU4       |
| Kaladp0840s<br>0019.1 | 1865 | kal-miR319                         | 0 | 0.00172 | ATTCP24,TCP24                 |
| Kaladp0058s<br>0602.1 | 739  | lja-miR397_L-<br>2R+2              | 0 | 0.00172 | ATLAC17,LAC17                 |
| Kaladp0040s<br>0160.1 | 1321 | mdm-<br>miR156a_1ss16<br>AG        | 0 | 0.00172 | SPL2                          |
| Kaladp0087s<br>0171.1 | 969  | mdm-<br>miR156t_L-<br>1R+1_1ss15AT | 0 | 0.00172 | SPL9                          |
| Kaladp0008s<br>0410.1 | 1782 | mdm-miR160a                        | 0 | 0.00172 | ARF16                         |
| Kaladp0032s<br>0311.2 | 1450 | mdm-<br>miR172a_R+1                | 0 | 0.00172 | RAP2.7,TOE1                   |
| Kaladp0082s<br>0172.1 | 1317 | ptc-<br>miR530a_R+1_1<br>ss20TG    | 0 | 0.00172 | TZP                           |
| Kaladp0095s<br>0553.1 | 863  | kal-miR164d                        | 0 | 0.00215 | ANAC100,ATNAC5,NAC100         |
| Kaladp0008s<br>0827.1 | 1161 | kal-miR166a                        | 0 | 0.00215 | ATHB-14,ATHB14,PHB,PHB-1D     |
| Kaladp0101s           | 1649 | kal-miR172c                        | 0 | 0.00215 | RAP2.7,TOE1                   |

|                       |      |                                    |   |         |                           |
|-----------------------|------|------------------------------------|---|---------|---------------------------|
| 0311.2                |      |                                    |   |         |                           |
| Kaladp0003s<br>0028.1 | 803  | lja-miR397_L-<br>2R+2              | 0 | 0.00215 | LAC12                     |
| Kaladp0088s<br>0066.1 | 1536 | mdm-<br>miR156a_1ss16<br>AG        | 0 | 0.00215 | SPL2                      |
| Kaladp0011s<br>1053.1 | 843  | mdm-<br>miR156t_L-<br>1R+1_1ss15AT | 0 | 0.00215 |                           |
| Kaladp0039s<br>0575.1 | 1601 | mdm-miR160a                        | 0 | 0.00215 | ARF16                     |
| Kaladp0101s<br>0311.1 | 1694 | mdm-<br>miR172a_R+1                | 0 | 0.00215 | RAP2.7,TOE1               |
| Kaladp0071s<br>0243.2 | 1751 | mdm-<br>miR172i_R-1                | 0 | 0.00215 | RAP2.7,TOE1               |
| Kaladp0082s<br>0172.3 | 1196 | ptc-<br>miR530a_R+1_1<br>ss20TG    | 0 | 0.00215 | TZP                       |
| Kaladp0039s<br>0699.2 | 812  | kal-miR166a                        | 0 | 0.00258 | IFL,IFL1,REV              |
| Kaladp0060s<br>0206.7 | 528  | kal-miR530a                        | 0 | 0.00258 | TZP                       |
| Kaladp0003s<br>0134.1 | 649  | kal-miR858                         | 0 | 0.00258 | ATMYB12,MYB12,PFG1        |
| Kaladp0039s<br>0575.2 | 1490 | mdm-miR160a                        | 0 | 0.00258 | ARF16                     |
| Kaladp0071s<br>0243.1 | 1744 | mdm-<br>miR172i_R-1                | 0 | 0.00258 | RAP2.7,TOE1               |
| Kaladp0003s<br>0134.3 | 800  | mdm-MIR858-<br>p5_1ss17AG          | 0 | 0.00258 | ATMYB12,MYB12,PFG1        |
| Kaladp0082s<br>0172.2 | 1233 | ptc-<br>miR530a_R+1_1<br>ss20TG    | 0 | 0.00258 | TZP                       |
| Kaladp0059s<br>0285.1 | 261  | ath-MIR858a-<br>p5_1ss17AG         | 0 | 0.00301 |                           |
| Kaladp0008s<br>0827.3 | 1028 | kal-miR166a                        | 0 | 0.00301 | ATHB-14,ATHB14,PHB,PHB-1D |
| Kaladp0060s<br>0206.6 | 639  | kal-miR530a                        | 0 | 0.00301 | TZP                       |
| Kaladp0024s<br>0285.2 | 1196 | mdm-miR159d                        | 0 | 0.00301 | ATMYB65,MYB65             |
| Kaladp0033s<br>0012.1 | 646  | mdm-miR160a                        | 0 | 0.00301 | ARF10                     |
| Kaladp0081s           | 1749 | mdm-miR166a                        | 0 | 0.00301 | IFL,IFL1,REV              |

|                       |      |                                 |   |         |               |
|-----------------------|------|---------------------------------|---|---------|---------------|
| 0257.1                |      |                                 |   |         |               |
| Kaladp0082s<br>0172.5 | 838  | ptc-<br>miR530a_R+1_1<br>ss20TG | 0 | 0.00301 | TZP           |
| Kaladp0060s<br>0206.5 | 528  | kal-miR530a                     | 0 | 0.00344 | TZP           |
| Kaladp0003s<br>0134.2 | 1084 | kal-miR858                      | 0 | 0.00344 |               |
| Kaladp0024s<br>0285.1 | 2322 | mdm-miR159d                     | 0 | 0.00344 | ATMYB65,MYB65 |
| Kaladp0039s<br>0699.1 | 1611 | mdm-miR166a                     | 0 | 0.00344 | IFL,IFL1,REV  |
| Kaladp0082s<br>0172.7 | 908  | ptc-<br>miR530a_R+1_1<br>ss20TG | 0 | 0.00344 | TZP           |
| Kaladp0023s<br>0071.1 | 1071 | kal-miR396b                     | 0 | 0.00387 | AtGRF1,GRF1   |
| Kaladp0060s<br>0206.1 | 1624 | kal-miR530a                     | 0 | 0.00387 | TZP           |
| Kaladp0003s<br>0134.4 | 993  | kal-miR858                      | 0 | 0.00387 |               |
| Kaladp0042s<br>0136.1 | 2093 | mdm-miR159d                     | 0 | 0.00387 | ATMYB65,MYB65 |
| Kaladp1184s<br>0001.1 | 1364 | mdm-miR160a                     | 0 | 0.00387 | ARF17         |
| Kaladp0081s<br>0257.2 | 1666 | mdm-miR166a                     | 0 | 0.00387 | IFL,IFL1,REV  |
| Kaladp0082s<br>0172.4 | 908  | ptc-<br>miR530a_R+1_1<br>ss20TG | 0 | 0.00387 | TZP           |
| Kaladp0023s<br>0071.2 | 529  | kal-miR396b                     | 0 | 0.0043  | AtGRF1,GRF1   |
| Kaladp0060s<br>0206.3 | 405  | kal-miR530a                     | 0 | 0.0043  | TZP           |
| Kaladp0042s<br>0136.2 | 1098 | mdm-miR159d                     | 0 | 0.0043  | ATMYB65,MYB65 |
| Kaladp0048s<br>0026.1 | 1910 | mdm-miR160a                     | 0 | 0.0043  | ARF16         |
| Kaladp0011s<br>0278.2 | 1270 | kal-miR396b                     | 0 | 0.00473 | AtGRF3,GRF3   |
| Kaladp0060s<br>0206.4 | 1624 | kal-miR530a                     | 0 | 0.00473 | TZP           |
| Kaladp0061s<br>0059.1 | 1734 | mdm-miR160a                     | 0 | 0.00473 | ARF16         |



|                       |      |                                 |   |         |                           |
|-----------------------|------|---------------------------------|---|---------|---------------------------|
| Kaladp0040s<br>0154.2 | 986  | kal-miR156a                     | 0 | 0.00515 |                           |
| Kaladp0040s<br>0154.4 | 1189 | kal-miR156a                     | 0 | 0.00515 |                           |
| Kaladp0011s<br>1278.1 | 1152 | kal-miR396b                     | 0 | 0.00515 | AtGRF7,GRF7               |
| Kaladp0060s<br>0206.2 | 414  | kal-miR530a                     | 0 | 0.00515 | TZP                       |
| Kaladp0040s<br>0154.7 | 1082 | mdm-<br>miR156t_L-<br>1_1ss15AT | 0 | 0.00515 |                           |
| Kaladp0008s<br>0827.2 | 1057 | mdm-miR166a                     | 0 | 0.00515 | ATHB-14,ATHB14,PHB,PHB-1D |
| Kaladp0131s<br>0018.1 | 729  | mdm-miR2111a                    | 0 | 0.00515 |                           |
| Kaladp0040s<br>0411.1 | 464  | kal-<br>miR_C1878_star          | 0 | 0.00558 | ATMYB66,MYB66,WER,WER1    |
| Kaladp0040s<br>0154.3 | 1125 | kal-miR156a                     | 0 | 0.00558 |                           |
| Kaladp0040s<br>0154.5 | 1094 | kal-miR156a                     | 0 | 0.00558 |                           |
| Kaladp0053s<br>0048.1 | 1702 | kal-miR167a                     | 0 | 0.00558 | ARF6                      |
| Kaladp0011s<br>0278.1 | 1270 | kal-miR396b                     | 0 | 0.00558 | AtGRF4,GRF4               |
| Kaladp0008s<br>0813.1 | 2639 | kal-miR167a                     | 0 | 0.00601 | ARF8,ATARF8               |
| Kaladp0630s<br>0030.1 | 738  | kal-miR397d                     | 0 | 0.00601 | ATLMCO4,IRX12,LAC4,LMCO4  |
| Kaladp0131s<br>0018.2 | 725  | mdm-miR2111a                    | 0 | 0.00601 |                           |
| Kaladp0039s<br>0128.1 | 922  | ppe-miR169d_L-<br>1R+1_1ss2GC   | 0 | 0.00601 |                           |
| Kaladp0008s<br>0921.1 | 206  | kal-miR172c                     | 0 | 0.00644 |                           |
| Kaladp0042s<br>0376.1 | 1113 | kal-miR396b                     | 0 | 0.00644 | AtGRF7,GRF7               |
| Kaladp0040s<br>0154.6 | 1988 | mdm-<br>miR156t_L-<br>1_1ss15AT | 0 | 0.00644 |                           |
| Kaladp0023s<br>0076.1 | 239  | mdm-miR2111a                    | 0 | 0.00644 | XTH6                      |
| Kaladp0911s<br>0004.2 | 915  | kal-miR166a                     | 0 | 0.00687 | ABI5,GIA1                 |

|                       |      |                                 |   |         |                              |
|-----------------------|------|---------------------------------|---|---------|------------------------------|
| Kaladp1040s<br>0002.2 | 1152 | kal-miR167a                     | 0 | 0.00687 | ARF6                         |
| Kaladp0008s<br>0921.2 | 206  | kal-miR172c                     | 0 | 0.00687 |                              |
| Kaladp0032s<br>0085.1 | 976  | kal-miR396b                     | 0 | 0.00687 | AtGRF5,GRF5                  |
| Kaladp0011s<br>0430.1 | 422  | kal-miR858                      | 0 | 0.00687 | ATMYB4,MYB4                  |
| Kaladp1040s<br>0002.1 | 1224 | kal-miR167a                     | 0 | 0.00729 | ARF6                         |
| Kaladp0911s<br>0004.1 | 1001 | mdm-miR166a                     | 0 | 0.00729 | ABI5,GIA1                    |
| Kaladp0011s<br>0687.1 | 916  | mdm-miR2111a                    | 0 | 0.00729 |                              |
| Kaladp0011s<br>1344.1 | 1955 | kal-miR319                      | 0 | 0.00772 | MEE35,TCP4                   |
| Kaladp0630s<br>0020.1 | 1741 | kal-miR319                      | 0 | 0.00815 | MEE35,TCP4                   |
| Kaladp0017s<br>0020.1 | 1491 | mdm-<br>miR156t_L-<br>1_1ss15AT | 0 | 0.00815 |                              |
| Kaladp0050s<br>0212.1 | 644  | kal-miR396b                     | 0 | 0.00858 | AtGRF2,GRF2                  |
| Kaladp0017s<br>0020.3 | 1377 | mdm-<br>miR156t_L-<br>1_1ss15AT | 0 | 0.00858 |                              |
| Kaladp0045s<br>0344.1 | 2578 | kal-miR167a                     | 0 | 0.009   | ARF8,ATARF8                  |
| Kaladp0008s<br>0428.1 | 159  | kal-miR172c                     | 0 | 0.009   |                              |
| Kaladp0017s<br>0020.2 | 1172 | mdm-<br>miR156t_L-<br>1_1ss15AT | 0 | 0.009   |                              |
| Kaladp0011s<br>0794.1 | 1794 | ppe-miR169d_L-<br>1R+1_1ss2GC   | 0 | 0.009   | ATHAP2A,EMB2220,HAP2A,NF-YA1 |
| Kaladp0045s<br>0344.2 | 2140 | kal-miR167a                     | 0 | 0.00943 | ARF8,ATARF8                  |
| Kaladp0044s<br>0073.1 | 487  | kal-miR858                      | 0 | 0.01071 | ATMYB111,MYB111,PFG3         |
| Kaladp0062s<br>0155.1 | 1768 | mdm-miR160a                     | 0 | 0.01071 | NPY2                         |
| Kaladp0441s<br>0001.2 | 1216 | kal-miR858                      | 0 | 0.01284 | ATMYB123,ATTT2,MYB123,TT2    |
| Kaladp0441s           | 1130 | kal-miR858                      | 0 | 0.01326 | ATMYB12,MYB12,PFG1           |

|                       |      |                                 |   |         |                    |
|-----------------------|------|---------------------------------|---|---------|--------------------|
| 0001.1                |      |                                 |   |         |                    |
| Kaladp0082s<br>0106.1 | 174  | mtr-MIR2673a-<br>p3_2ss3TA20TG  | 0 | 0.01666 | ATFIB2,FIB2        |
| Kaladp0011s<br>1345.4 | 932  | mdm-miR159d                     | 1 | 0.01863 |                    |
| Kaladp0066s<br>0109.1 | 465  | kal-miR858                      | 0 | 0.01877 | ATMYB5,MYB5        |
| Kaladp0096s<br>0027.1 | 270  | kal-miR858                      | 1 | 0.02099 | ATMYB3,MYB3        |
| Kaladp0020s<br>0191.2 | 645  | kal-miR396b                     | 0 | 0.02844 | WRKY21             |
| Kaladp0192s<br>0023.1 | 561  | mdm-<br>miR396b_1ss2T<br>C      | 0 | 0.0297  | ATMMS21,HPY2,MMS21 |
| Kaladp0674s<br>0155.1 | 1443 | kal-miR167a                     | 0 | 0.03095 | AtTCP14,TCP14      |
| Kaladp0032s<br>0387.1 | 241  | mtr-MIR2673a-<br>p3_2ss3TA20TG  | 0 | 0.03095 |                    |
| Kaladp0043s<br>0146.1 | 304  | kal-miR_C689                    | 0 | 0.0347  | PQL1,PQL2          |
| Kaladp0630s<br>0021.1 | 1263 | mdm-miR159d                     | 0 | 0.03677 |                    |
| Kaladp0011s<br>1345.1 | 1422 | mdm-miR159d                     | 0 | 0.0376  |                    |
| Kaladp0011s<br>1345.3 | 1234 | mdm-miR159d                     | 0 | 0.03802 |                    |
| Kaladp0030s<br>0093.3 | 533  | kal-miR166a                     | 0 | 0.03885 | AtTLP3,TLP3        |
| Kaladp0878s<br>0004.1 | 154  | fve-<br>miR396e_R+1_1<br>ss21TC | 1 | 0.03942 |                    |
| Kaladp0030s<br>0093.2 | 486  | kal-miR166a                     | 0 | 0.04009 | AtTLP3,TLP3        |
| Kaladp0030s<br>0093.1 | 662  | kal-miR166a                     | 0 | 0.0405  | AtTLP3,TLP3        |
| Kaladp0213s<br>0007.1 | 942  | kal-miR166a                     | 0 | 0.04339 | GAMMA-SNAP,GSNAP   |
| Kaladp0037s<br>0134.1 | 503  | kal-miR858                      | 0 | 0.04627 | AtMYB109,MYB109    |
| Kaladp0168s<br>0012.1 | 815  | mdm-miR159d                     | 0 | 0.04627 |                    |
| Kaladp0024s<br>0331.2 | 1421 | ppe-miR169d_L-<br>1R+1_1ss2GC   | 0 | 0.04709 | NF-YA9             |
| Kaladp0058s           | 1253 | mdm-                            | 1 | 0.04918 |                    |

|                       |      |                               |   |         |               |
|-----------------------|------|-------------------------------|---|---------|---------------|
| 0159.1                |      | miR393g_2ss12<br>CT16TC       |   |         |               |
| Kaladp0013s<br>0034.1 | 300  | kal-miR858                    | 0 | 0.05282 | ATMYB73,MYB73 |
| Kaladp0779s<br>0001.2 | 217  | ath-MIR858a-<br>p5_1ss17AG    | 4 | 0.05487 |               |
| Kaladp0048s<br>0300.1 | 1742 | kal-<br>miR_C450_star         | 4 | 0.05487 |               |
| Kaladp0024s<br>0105.1 | 233  | kal-miR_C5376                 | 4 | 0.05487 |               |
| Kaladp0002s<br>0088.2 | 1516 | mdm-<br>miR160a_L+1R-<br>1    | 4 | 0.05487 | ARF16         |
| Kaladp0040s<br>0342.1 | 175  | kal-<br>miR_C625_star         | 1 | 0.06278 | PMP22         |
| Kaladp0100s<br>0087.8 | 1370 | kal-miR858                    | 1 | 0.06503 |               |
| Kaladp0045s<br>0167.1 | 1018 | bol-MIR9410-<br>p3_2ss5TG18TA | 2 | 0.06702 | ATMGL,MGL     |
| Kaladp0048s<br>0753.2 | 252  | cca-miR396a-<br>3p_L+2R-2     | 2 | 0.06702 |               |
| Kaladp0007s<br>0012.1 | 854  | kal-miR_C1878                 | 2 | 0.06702 |               |
| Kaladp0007s<br>0012.2 | 986  | kal-<br>miR_C1878_star        | 2 | 0.06702 |               |
| Kaladp0024s<br>0285.2 | 1195 | kal-<br>miR_C207_star         | 2 | 0.06702 | ATMYB65,MYB65 |
| Kaladp0071s<br>0070.1 | 457  | kal-<br>miR_C400_star         | 2 | 0.06702 |               |
| Kaladp0087s<br>0188.1 | 972  | kal-<br>miR167a_star          | 2 | 0.06702 |               |
| Kaladp0779s<br>0001.1 | 251  | kal-miR858                    | 2 | 0.06702 |               |
| Kaladp0087s<br>0171.1 | 970  | mdm-miR156t                   | 2 | 0.06702 | SPL9          |
| Kaladp0093s<br>0080.1 | 1547 | mdm-miR171c                   | 2 | 0.06702 | ATHAM3,HAM3   |
| Kaladp0032s<br>0361.1 | 1008 | mdm-<br>miR171c_1ss14<br>CT   | 2 | 0.06702 | ATHAM3,HAM3   |
| Kaladp0099s<br>0085.3 | 1726 | mdm-<br>miR172i_L+1R-1        | 2 | 0.06702 | RAP2.7,TOE1   |
| Kaladp0007s<br>0058.2 | 180  | vvi-MIR3627-<br>p5_2ss5CG18C  | 2 | 0.06702 | ELF9          |

| A                     |      |                               |   |         |                           |
|-----------------------|------|-------------------------------|---|---------|---------------------------|
| Kaladp0024s<br>0457.1 | 589  | kal-<br>miR_C689_star         | 3 | 0.07181 |                           |
| Kaladp0067s<br>0186.1 | 1151 | kal-miR319_star               | 3 | 0.07181 |                           |
| Kaladp0048s<br>0753.2 | 250  | kal-<br>miR396b_star          | 3 | 0.07181 |                           |
| Kaladp0550s<br>0075.1 | 1294 | kal-<br>miR530a_star          | 3 | 0.07181 |                           |
| Kaladp0098s<br>0188.1 | 2417 | mtr-miR396b-<br>3p_2ss5AG20AT | 3 | 0.07181 | AHA2,HA2,PMA2             |
| Kaladp0002s<br>0132.1 | 955  | csi-MIR399f-<br>p5_1ss8TC     | 1 | 0.07914 | iqd2                      |
| Kaladp0067s<br>0202.2 | 510  | mdm-miR171c                   | 0 | 0.08055 |                           |
| Kaladp0057s<br>0041.1 | 2846 | kal-<br>miR166a_star          | 0 | 0.0845  |                           |
| Kaladp0024s<br>0280.3 | 548  | kal-<br>miR_C625_star         | 0 | 0.08765 |                           |
| Kaladp0102s<br>0075.1 | 1443 | mdm-miR159d                   | 1 | 0.08958 | AP4.3A                    |
| Kaladp0079s<br>0026.1 | 236  | kal-miR397d                   | 0 | 0.09039 |                           |
| Kaladp0001s<br>0197.2 | 303  | kal-<br>miR156a_star          | 0 | 0.09235 |                           |
| Kaladp0063s<br>0058.1 | 2178 | gma-MIR5775-<br>p3_2ss9AC18GT | 0 | 0.09547 | CRR2                      |
| Kaladp0008s<br>0391.1 | 391  | kal-miR858                    | 0 | 0.10323 | ATMYB7,ATY49,MYB7         |
| Kaladp0008s<br>0500.2 | 556  | kal-miR858                    | 0 | 0.104   | ATMYB123,ATTT2,MYB123,TT2 |
| Kaladp0035s<br>0040.1 | 617  | kal-miR396b                   | 0 | 0.10439 |                           |
| Kaladp0008s<br>0500.3 | 467  | kal-miR858                    | 0 | 0.10593 | ATMYB123,ATTT2,MYB123,TT2 |
| Kaladp0008s<br>0500.1 | 412  | kal-miR858                    | 0 | 0.1067  | ATMYB12,MYB12,PFG1        |
| Kaladp0068s<br>0375.2 | 295  | kal-<br>miR_C689_star         | 4 | 0.10673 | HXK3                      |
| Kaladp0102s<br>0152.2 | 1945 | kal-<br>miR156a_star          | 4 | 0.10673 |                           |
| Kaladp0072s<br>0073.3 | 406  | lus-MIR399b-<br>p5_2ss6AG17AT | 4 | 0.10673 |                           |

|                       |      |                                    |   |         |                         |
|-----------------------|------|------------------------------------|---|---------|-------------------------|
| Kaladp0011s<br>0996.1 | 364  | mdm-miR403a                        | 4 | 0.10673 |                         |
| Kaladp0036s<br>0147.1 | 2933 | ppe-MIR171d-<br>p3_1ss13TG         | 4 | 0.10673 | TPR4,WSIP2              |
| Kaladp0079s<br>0134.2 | 754  | kal-miR530a                        | 0 | 0.12422 | ATSRG1,SRG1             |
| Kaladp0037s<br>0196.1 | 545  | kal-miR858                         | 0 | 0.12497 | TFIIS                   |
| Kaladp0016s<br>0093.1 | 2414 | kal-<br>miR_C625_star              | 0 | 0.12723 |                         |
| Kaladp0102s<br>0125.1 | 463  | kal-miR858                         | 0 | 0.12873 | AtMYB36,MYB36           |
| Kaladp0042s<br>0136.2 | 1097 | kal-<br>miR_C207_star              | 2 | 0.12954 | ATMYB65,MYB65           |
| Kaladp0036s<br>0247.1 | 951  | kal-miR_C5376                      | 2 | 0.12954 |                         |
| Kaladp0550s<br>0075.1 | 986  | kal-<br>miR156a_star               | 2 | 0.12954 |                         |
| Kaladp0043s<br>0276.1 | 1293 | kal-miR166a                        | 2 | 0.12954 | ATHB-15,ATHB15,CNA,ICU4 |
| Kaladp0024s<br>0202.1 | 243  | kal-<br>miR166a_star               | 2 | 0.12954 | LTA2,PLE2               |
| Kaladp0779s<br>0018.5 | 217  | kal-<br>miR169c_star               | 2 | 0.12954 | APG2,PGA2,TATC,UNE3     |
| Kaladp0088s<br>0122.1 | 366  | kal-miR319                         | 2 | 0.12954 |                         |
| Kaladp0062s<br>0033.1 | 1177 | kal-<br>miR530a_star               | 2 | 0.12954 | CER6,CUT1,G2,KCS6,POP1  |
| Kaladp0015s<br>0067.1 | 1441 | mdm-miR171c                        | 2 | 0.12954 | ATHAM3,HAM3             |
| Kaladp0007s<br>0058.1 | 181  | vvi-MIR3627-<br>p5_2ss5CG18C<br>A  | 2 | 0.12954 | ELF9                    |
| Kaladp0048s<br>0183.2 | 568  | kal-<br>miR_C625_star              | 0 | 0.1336  | SKIP6                   |
| Kaladp0048s<br>0183.3 | 568  | kal-<br>miR_C625_star              | 0 | 0.13397 | SKIP6                   |
| Kaladp0048s<br>0183.1 | 568  | kal-<br>miR_C625_star              | 0 | 0.13434 | SKIP6                   |
| Kaladp0808s<br>0041.2 | 572  | mdm-miR160a                        | 0 | 0.13695 | ATERF-5,ATERF5,ERF5     |
| Kaladp0059s<br>0142.2 | 969  | ath-MIR5655-<br>p5_2ss15CT18T<br>A | 3 | 0.13847 |                         |

|                       |      |                                   |   |         |                                                   |
|-----------------------|------|-----------------------------------|---|---------|---------------------------------------------------|
| Kaladp0048s<br>0753.1 | 252  | cca-miR396a-<br>3p_L+2R-2         | 3 | 0.13847 |                                                   |
| Kaladp0024s<br>0688.1 | 687  | kal-<br>miR164d_star              | 3 | 0.13847 |                                                   |
| Kaladp0048s<br>0753.1 | 250  | kal-<br>miR396b_star              | 3 | 0.13847 |                                                   |
| Kaladp0003s<br>0155.1 | 888  | mdm-miR162a                       | 3 | 0.13847 |                                                   |
| Kaladp0891s<br>0016.1 | 1751 | mdm-<br>miR172i_L+1R-1            | 3 | 0.13847 | AP2,FL1,FLO2                                      |
| Kaladp0048s<br>0753.1 | 249  | stu-miR396-<br>3p_L-1_1ss3CT      | 3 | 0.13847 |                                                   |
| Kaladp0040s<br>0498.1 | 399  | mdm-miR159d                       | 1 | 0.1428  |                                                   |
| Kaladp0049s<br>0025.4 | 424  | mdm-<br>miR393g_2ss12<br>CT16TC   | 0 | 0.14766 | TAPX                                              |
| Kaladp0083s<br>0083.2 | 77   | kal-<br>miR166a_star              | 0 | 0.15461 | ATMAP2K_ALPHA,ATMEK5,ATMKK5,MAP<br>2K_A,MEK5,MKK5 |
| Kaladp0011s<br>0995.1 | 1125 | bol-MIR9410-<br>p3_2ss5TG18TA     | 4 | 0.15574 |                                                   |
| Kaladp0088s<br>0122.3 | 366  | kal-miR319                        | 4 | 0.15574 |                                                   |
| Kaladp0433s<br>0005.1 | 1687 | kal-<br>miR_C625_star             | 0 | 0.15606 | VHA-A                                             |
| Kaladp0048s<br>0113.1 | 846  | mdm-MIR397a-<br>p3_2ss7TG21A<br>G | 0 | 0.17475 | AtVEX1                                            |
| Kaladp0092s<br>0167.1 | 338  | mtr-MIR2673a-<br>p3_2ss3TA20TG    | 0 | 0.18324 |                                                   |
| Kaladp0067s<br>0129.1 | 523  | mdm-miR159d                       | 0 | 0.18359 | ATBPC6,BBR/BPC6,BPC6                              |
| Kaladp1222s<br>0012.1 | 1379 | fve-MIR845-<br>p5_2ss6GC19AT      | 2 | 0.18788 |                                                   |
| Kaladp0030s<br>0092.1 | 199  | ghr-MIR827a-<br>p3_1ss6CG         | 2 | 0.18788 |                                                   |
| Kaladp0024s<br>0285.1 | 2321 | kal-<br>miR_C207_star             | 2 | 0.18788 | ATMYB65,MYB65                                     |
| Kaladp0095s<br>0509.1 | 1302 | kal-miR166a                       | 2 | 0.18788 | ATHB-15,ATHB15,CNA,ICU4                           |
| Kaladp0779s<br>0018.3 | 215  | kal-<br>miR169c_star              | 2 | 0.18788 | APG2,PGA2,TATC,UNE3                               |
| Kaladp0048s<br>0043.1 | 125  | kal-miR319_star                   | 2 | 0.18788 | ATL31,CNI1                                        |

|                       |      |                                    |   |         |                            |
|-----------------------|------|------------------------------------|---|---------|----------------------------|
| Kaladp0072s<br>0073.1 | 526  | lus-MIR399b-<br>p5_2ss6AG17AT      | 2 | 0.18788 |                            |
| Kaladp0099s<br>0085.4 | 1675 | mdm-<br>miR172i_L+1R-1             | 2 | 0.18788 | RAP2.7,TOE1                |
| Kaladp0003s<br>0028.1 | 804  | mdm-MIR397a-<br>p3_2ss7TG21A<br>G  | 2 | 0.18788 | LAC12                      |
| Kaladp0048s<br>0753.2 | 249  | stu-miR396-<br>3p_L-1_1ss3CT       | 2 | 0.18788 |                            |
| Kaladp0076s<br>0185.1 | 442  | vvi-miR3630-<br>3p_L-1_1ss2TA      | 2 | 0.18788 |                            |
| Kaladp0059s<br>0142.1 | 953  | ath-MIR5655-<br>p5_2ss15CT18T<br>A | 3 | 0.20034 |                            |
| Kaladp0036s<br>0141.1 | 938  | cca-miR396a-<br>3p_L+2R-2          | 3 | 0.20034 |                            |
| Kaladp0102s<br>0029.1 | 79   | kal-<br>miR_C400_star              | 3 | 0.20034 |                            |
| Kaladp0060s<br>0028.1 | 651  | kal-<br>miR_C625_star              | 3 | 0.20034 |                            |
| Kaladp0068s<br>0375.1 | 357  | kal-<br>miR_C689_star              | 3 | 0.20034 | HXK3                       |
| Kaladp0008s<br>0921.2 | 392  | kal-<br>miR172c_star               | 3 | 0.20034 |                            |
| Kaladp0042s<br>0225.1 | 456  | kal-miR858                         | 3 | 0.20034 |                            |
| Kaladp0002s<br>0088.1 | 1900 | mdm-<br>miR160a_L+1R-<br>1         | 3 | 0.20034 | ARF16                      |
| Kaladp0047s<br>0031.1 | 568  | mdm-<br>miR168a_1ss2C<br>T         | 3 | 0.20034 |                            |
| Kaladp0110s<br>0011.1 | 233  | mdm-miR403a                        | 3 | 0.20034 |                            |
| Kaladp0048s<br>0788.1 | 2721 | kal-miR_C5376                      | 4 | 0.20207 | SEU                        |
| Kaladp0103s<br>0028.1 | 853  | kal-<br>miR_C625_star              | 4 | 0.20207 | EMB161,EMB251,EMB2775,RFC3 |
| Kaladp0779s<br>0018.1 | 217  | kal-<br>miR169c_star               | 4 | 0.20207 | APG2,PGA2,TATC,UNE3        |
| Kaladp0008s<br>0921.1 | 392  | kal-<br>miR172c_star               | 4 | 0.20207 |                            |
| Kaladp0058s<br>0478.2 | 181  | mtr-miR396b-3p                     | 4 | 0.20207 | GUX1,PGSIP1                |



|                       |      |                                   |   |         |                                                   |
|-----------------------|------|-----------------------------------|---|---------|---------------------------------------------------|
| Kaladp0152s<br>0023.1 | 437  | vvi-MIR3627-<br>p5_2ss5CG18C<br>A | 1 | 0.23106 | AtTLP2,TLP2                                       |
| Kaladp0093s<br>0071.1 | 388  | nta-MIR171a-<br>p5_1ss11GA        | 0 | 0.23334 |                                                   |
| Kaladp0023s<br>0071.2 | 530  | fve-<br>miR396e_R+1_1<br>ss21TC   | 2 | 0.2423  | AtGRF1,GRF1                                       |
| Kaladp0103s<br>0004.2 | 1556 | gma-MIR5775-<br>p3_2ss9AC18GT     | 2 | 0.2423  | VAD1                                              |
| Kaladp0042s<br>0136.1 | 2092 | kal-<br>miR_C207_star             | 2 | 0.2423  | ATMYB65,MYB65                                     |
| Kaladp0053s<br>0163.1 | 808  | kal-<br>miR164d_star              | 2 | 0.2423  | AtXRN3,XRN3                                       |
| Kaladp0092s<br>0159.1 | 1343 | kal-miR166a                       | 2 | 0.2423  | ATHB-15,ATHB15,CNA,ICU4                           |
| Kaladp0011s<br>1053.1 | 844  | mdm-miR156t                       | 2 | 0.2423  |                                                   |
| Kaladp0008s<br>0410.1 | 1783 | mdm-<br>miR160a_L+1R-<br>1        | 2 | 0.2423  | ARF16                                             |
| Kaladp0099s<br>0085.2 | 1729 | mdm-<br>miR172i_L+1R-1            | 2 | 0.2423  | RAP2.7,TOE1                                       |
| Kaladp0082s<br>0121.1 | 431  | mdm-MIR397a-<br>p3_2ss7TG21A<br>G | 2 | 0.2423  |                                                   |
| Kaladp0084s<br>0021.3 | 407  | kal-<br>miR_C689_star             | 4 | 0.24585 |                                                   |
| Kaladp0043s<br>0306.1 | 1131 | kal-miR858_star                   | 4 | 0.24585 | AAA1,ATKTN1,BOT1,ERH3,FRA2,FRC2,FT<br>R,KTN1,LUE1 |
| Kaladp0072s<br>0073.4 | 632  | lus-MIR399b-<br>p5_2ss6AG17AT     | 4 | 0.24585 |                                                   |
| Kaladp0017s<br>0020.2 | 1173 | mdm-<br>miR156t_R-<br>1_1ss15AT   | 4 | 0.24585 |                                                   |
| Kaladp0039s<br>0588.1 | 586  | bol-MIR9410-<br>p3_2ss5TG18TA     | 3 | 0.25776 |                                                   |
| Kaladp0095s<br>0382.1 | 395  | kal-<br>miR_C400_star             | 3 | 0.25776 | ATMAPK3,ATMPK3,MPK3                               |
| Kaladp0475s<br>0002.1 | 398  | kal-<br>miR156a_star              | 3 | 0.25776 |                                                   |
| Kaladp0088s<br>0122.2 | 365  | kal-miR319                        | 3 | 0.25776 |                                                   |
| Kaladp0072s           | 292  | lus-MIR399b-                      | 3 | 0.25776 |                                                   |

|             |      |                         |   |         |                                |
|-------------|------|-------------------------|---|---------|--------------------------------|
| 0073.2      |      | p5_2ss6AG17AT           |   |         |                                |
| Kaladp0085s | 335  | mdm-miR403a             | 3 | 0.25776 |                                |
| 0097.1      |      |                         |   |         |                                |
| Kaladp0055s | 620  | mdm-MIR397a-            | 0 | 0.2593  |                                |
| 0162.1      |      | p3_2ss7TG21A<br>G       |   |         |                                |
| Kaladp0010s | 639  | ath-MIR858a-            | 1 | 0.26609 |                                |
| 0061.1      |      | p5_1ss17AG              |   |         |                                |
| Kaladp0043s | 2260 | kal-                    | 1 | 0.26638 |                                |
| 0292.1      |      | miR169c_star            |   |         |                                |
| Kaladp1221s | 846  | kal-miR396b             | 0 | 0.28439 |                                |
| 0044.1      |      |                         |   |         |                                |
| Kaladp0006s | 85   | kal-                    | 4 | 0.28723 | KING1                          |
| 0047.1      |      | miR156a_star            |   |         |                                |
| Kaladp0038s | 1550 | kal-                    | 4 | 0.28723 |                                |
| 0106.1      |      | miR166a_star            |   |         |                                |
| Kaladp0062s | 1000 | kal-miR167a             | 4 | 0.28723 | ATLIP1,LIP1                    |
| 0137.1      |      |                         |   |         |                                |
| Kaladp0067s | 305  | kal-                    | 4 | 0.28723 | ARFA1F,ATARFA1F                |
| 0257.3      |      | miR172c_star            |   |         |                                |
| Kaladp0011s | 1271 | fve-                    | 2 | 0.29308 | AtGRF3,GRF3                    |
| 0278.2      |      | miR396e_R+1_1<br>ss21TC |   |         |                                |
| Kaladp0103s | 1563 | gma-MIR5775-            | 2 | 0.29308 | VAD1                           |
| 0004.1      |      | p3_2ss9AC18GT           |   |         |                                |
| Kaladp0095s | 395  | kal-                    | 2 | 0.29308 | ATMAPK3,ATMPK3,MPK3            |
| 0382.2      |      | miR_C400_star           |   |         |                                |
| Kaladp0008s | 1030 | kal-miR166a             | 2 | 0.29308 | ATHB-14,ATHB14,PHB,PHB-1D      |
| 0827.3      |      |                         |   |         |                                |
| Kaladp0779s | 217  | kal-                    | 2 | 0.29308 | APG2,PGA2,TATC,UNE3            |
| 0018.4      |      | miR169c_star            |   |         |                                |
| Kaladp0028s | 818  | kal-miR319              | 2 | 0.29308 | AtHsp90.2,ERD8,HSP81-2,HSP90.2 |
| 0100.1      |      |                         |   |         |                                |
| Kaladp0094s | 1561 | mdm-miR156t             | 2 | 0.29308 |                                |
| 0012.2      |      |                         |   |         |                                |
| Kaladp0059s | 440  | mdm-miR162a             | 2 | 0.29308 | AtCTR1,CTR1,SIS1               |
| 0103.1      |      |                         |   |         |                                |
| Kaladp0099s | 1551 | mdm-                    | 2 | 0.29308 | RAP2.7,TOE1                    |
| 0085.1      |      | miR172i_L+1R-1          |   |         |                                |
| Kaladp0048s | 335  | mdm-                    | 2 | 0.29308 |                                |
| 0753.2      |      | miR396b_1ss2T<br>C      |   |         |                                |
| Kaladp0048s | 2725 | vvi-miR3630-            | 2 | 0.29308 |                                |
| 0652.1      |      | 3p_L-1_1ss2TA           |   |         |                                |

|                       |      |                                          |   |         |                           |
|-----------------------|------|------------------------------------------|---|---------|---------------------------|
| Kaladp0011s<br>0186.1 | 870  | kal-<br>miR_C625_star                    | 3 | 0.31107 |                           |
| Kaladp0016s<br>0260.1 | 482  | kal-miR167a                              | 3 | 0.31107 |                           |
| Kaladp0068s<br>0032.1 | 707  | kal-miR397d                              | 3 | 0.31107 | ATLAC1,LAC1               |
| Kaladp0674s<br>0024.1 | 733  | kal-miR858                               | 3 | 0.31107 |                           |
| Kaladp0039s<br>0575.1 | 1602 | mdm-<br>miR160a_L+1R-<br>1               | 3 | 0.31107 | ARF16                     |
| Kaladp0051s<br>0089.1 | 229  | mdm-miR403a                              | 3 | 0.31107 | AtHsp90.4,Hsp81.4         |
| Kaladp0048s<br>0102.5 | 211  | csi-MIR167b-<br>p3_1ss19CT               | 4 | 0.32634 |                           |
| Kaladp0090s<br>0069.2 | 1121 | kal-<br>miR397d_star                     | 4 | 0.32634 | FAB1B                     |
| Kaladp0101s<br>0088.2 | 698  | kal-<br>miR530a_star                     | 4 | 0.32634 | AT-HSFB2A,HSFB2A          |
| Kaladp0008s<br>0029.2 | 284  | mdm-<br>MIR10981b-<br>p5_2ss15TG18A<br>T | 4 | 0.32634 |                           |
| Kaladp0808s<br>0002.1 | 596  | ath-MIR5655-<br>p5_2ss15CT18T<br>A       | 2 | 0.34045 |                           |
| Kaladp0048s<br>0102.6 | 211  | csi-MIR167b-<br>p3_1ss19CT               | 2 | 0.34045 |                           |
| Kaladp0023s<br>0071.1 | 1072 | fve-<br>miR396e_R+1_1<br>ss21TC          | 2 | 0.34045 | AtGRF1,GRF1               |
| Kaladp0041s<br>0017.1 | 244  | fve-MIR845-<br>p5_2ss6GC19AT             | 2 | 0.34045 |                           |
| Kaladp0021s<br>0092.1 | 1440 | kal-miR_C5376                            | 2 | 0.34045 |                           |
| Kaladp0039s<br>0699.2 | 814  | kal-miR166a                              | 2 | 0.34045 | IFL,IFL1,REV              |
| Kaladp0032s<br>0009.1 | 787  | kal-<br>miR166a_star                     | 2 | 0.34045 | ATSCO1,ATSCO1/CPEF-G,SCO1 |
| Kaladp0096s<br>0089.1 | 756  | kal-miR169c                              | 2 | 0.34045 |                           |
| Kaladp0779s<br>0018.2 | 215  | kal-<br>miR169c_star                     | 2 | 0.34045 | APG2,PGA2,TATC,UNE3       |
| Kaladp0094s           | 1364 | mdm-                                     | 2 | 0.34045 |                           |

|                       |      |                                          |   |         |                                                   |
|-----------------------|------|------------------------------------------|---|---------|---------------------------------------------------|
| 0012.3                |      | miR156t_L-<br>1_1ss15AT                  |   |         |                                                   |
| Kaladp0032s<br>0311.1 | 1526 | mdm-<br>miR172i_L+1R-1                   | 2 | 0.34045 | RAP2.7,TOE1                                       |
| Kaladp0056s<br>0149.1 | 1451 | kal-<br>miR164d_star                     | 3 | 0.36054 | TSL                                               |
| Kaladp0048s<br>0789.1 | 565  | kal-<br>miR167a_star                     | 3 | 0.36054 |                                                   |
| Kaladp0606s<br>0013.1 | 1074 | kal-miR319                               | 3 | 0.36054 | CLT3                                              |
| Kaladp0043s<br>0253.1 | 328  | kal-miR319_star                          | 3 | 0.36054 | CARA                                              |
| Kaladp0043s<br>0306.2 | 998  | kal-miR858_star                          | 3 | 0.36054 | AAA1,ATKTN1,BOT1,ERH3,FRA2,FRC2,F<br>TR,KTN1,LUE1 |
| Kaladp0059s<br>0103.3 | 421  | mdm-miR162a                              | 3 | 0.36054 | AtCTR1,CTR1,SIS1                                  |
| Kaladp0048s<br>0753.1 | 335  | mdm-<br>miR396b_1ss2T<br>C               | 3 | 0.36054 |                                                   |
| Kaladp0001s<br>0295.1 | 1302 | hbr-MIR6173-<br>p5_2ss21AG22G<br>C       | 4 | 0.3633  |                                                   |
| Kaladp0090s<br>0069.1 | 1255 | kal-<br>miR397d_star                     | 4 | 0.3633  | FAB1B                                             |
| Kaladp0008s<br>0029.3 | 284  | mdm-<br>MIR10981b-<br>p5_2ss15TG18A<br>T | 4 | 0.3633  |                                                   |
| Kaladp0051s<br>0086.2 | 325  | mdm-<br>miR168a_1ss2C<br>T               | 4 | 0.3633  |                                                   |
| Kaladp0091s<br>0175.2 | 127  | mdm-miR2111a                             | 4 | 0.3633  |                                                   |
| Kaladp1222s<br>0058.1 | 666  | aly-MIR408-<br>p5_2ss4CT20TC             | 1 | 0.37077 |                                                   |
| Kaladp0011s<br>0278.1 | 1271 | fve-<br>miR396e_R+1_1<br>ss21TC          | 2 | 0.38465 | AtGRF4,GRF4                                       |
| Kaladp0047s<br>0013.1 | 2255 | fve-MIR845-<br>p5_2ss6GC19AT             | 2 | 0.38465 | BGAL3                                             |
| Kaladp0011s<br>0987.1 | 1602 | kal-miR_C5376                            | 2 | 0.38465 | ATAZG1,AZG1                                       |
| Kaladp0032s<br>0009.2 | 787  | kal-<br>miR166a_star                     | 2 | 0.38465 | ATSCO1,ATSCO1/CPEF-G,SCO1                         |

|                       |      |                                    |   |         |                           |
|-----------------------|------|------------------------------------|---|---------|---------------------------|
| Kaladp0003s<br>0134.2 | 1083 | kal-miR858                         | 2 | 0.38465 |                           |
| Kaladp0011s<br>0688.1 | 101  | kal-miR858_star                    | 2 | 0.38465 | PRA1.A2                   |
| Kaladp0059s<br>0103.2 | 440  | mdm-miR162a                        | 2 | 0.38465 | AtCTR1,CTR1,SIS1          |
| Kaladp0037s<br>0298.1 | 637  | mdm-<br>miR168a_1ss2C<br>T         | 2 | 0.38465 |                           |
| Kaladp0032s<br>0311.3 | 1496 | mdm-<br>miR172i_L+1R-1             | 2 | 0.38465 | RAP2.7,TOE1               |
| Kaladp0091s<br>0175.1 | 127  | mdm-miR211a                        | 2 | 0.38465 |                           |
| Kaladp0042s<br>0242.1 | 989  | mdm-<br>miR396b_1ss2T<br>C         | 2 | 0.38465 |                           |
| Kaladp0055s<br>0456.2 | 776  | kal-<br>miR_C1878_star             | 4 | 0.39824 |                           |
| Kaladp0067s<br>0271.1 | 599  | kal-miR164d                        | 4 | 0.39824 | ATUXS2,AUD1,UXS2          |
| Kaladp0053s<br>0164.1 | 694  | kal-<br>miR172c_star               | 4 | 0.39824 | APS2,ASA1                 |
| Kaladp0091s<br>0175.4 | 127  | mdm-miR211a                        | 4 | 0.39824 |                           |
| Kaladp0011s<br>0106.1 | 984  | hbr-MIR6173-<br>p5_2ss21AG22G<br>C | 3 | 0.40646 |                           |
| Kaladp0023s<br>0025.2 | 877  | kal-miR169c                        | 3 | 0.40646 | ATHMA1,HMA1               |
| Kaladp0091s<br>0111.1 | 385  | kal-miR319_star                    | 3 | 0.40646 |                           |
| Kaladp0085s<br>0126.1 | 168  | nta-MIR168a-<br>p3_2ss1CA19G<br>C  | 3 | 0.40646 |                           |
| Kaladp0031s<br>0011.1 | 596  | ath-MIR5655-<br>p5_2ss15CT18T<br>A | 2 | 0.42589 |                           |
| Kaladp0022s<br>0101.2 | 761  | kal-miR_C450                       | 2 | 0.42589 | ATLCB1,EMB2779,FBR11,LCB1 |
| Kaladp0040s<br>0482.1 | 919  | kal-<br>miR_C450_star              | 2 | 0.42589 |                           |
| Kaladp0008s<br>0827.2 | 1059 | kal-miR166a                        | 2 | 0.42589 | ATHB-14,ATHB14,PHB,PHB-1D |
| Kaladp0101s           | 815  | kal-                               | 2 | 0.42589 | AT-HSFB2A,HSFB2A          |

|                       |      |                                   |   |         |                            |
|-----------------------|------|-----------------------------------|---|---------|----------------------------|
| 0088.1                |      | miR530a_star                      |   |         |                            |
| Kaladp0003s<br>0134.3 | 799  | kal-miR858                        | 2 | 0.42589 | ATMYB12,MYB12,PFG1         |
| Kaladp0094s<br>0012.2 | 1560 | mdm-<br>miR156t_L-<br>1_1ss15AT   | 2 | 0.42589 |                            |
| Kaladp0048s<br>0026.1 | 1911 | mdm-<br>miR160a_L+1R-<br>1        | 2 | 0.42589 | ARF16                      |
| Kaladp0042s<br>0133.2 | 2035 | vvi-MIR3627-<br>p5_2ss5CG18C<br>A | 1 | 0.42713 |                            |
| Kaladp0550s<br>0061.2 | 1741 | gma-MIR5368-<br>p3_2ss1AT18CA     | 4 | 0.43126 |                            |
| Kaladp0055s<br>0456.1 | 990  | kal-<br>miR_C1878_star            | 4 | 0.43126 |                            |
| Kaladp0068s<br>0181.1 | 190  | kal-<br>miR_C689_star             | 4 | 0.43126 |                            |
| Kaladp0095s<br>0221.1 | 2184 | kal-<br>miR172c_star              | 4 | 0.43126 | ATCAP-C,ATSMC3,ATSMC4,SMC3 |
| Kaladp0012s<br>0053.1 | 1257 | gma-MIR5775-<br>p3_2ss9AC18GT     | 3 | 0.44909 |                            |
| Kaladp0021s<br>0108.1 | 1121 | kal-miR_C207                      | 3 | 0.44909 | ATWL4,CIPK12,SnRK3.9,WL4   |
| Kaladp0067s<br>0271.2 | 599  | kal-miR164d                       | 3 | 0.44909 | ATUXS2,AUD1,UXS2           |
| Kaladp0011s<br>0056.1 | 459  | kal-miR858_star                   | 3 | 0.44909 | ATMEPCT,ISPD,MCT           |
| Kaladp0740s<br>0004.1 | 1965 | lja-miR397_L-<br>2R+2             | 3 | 0.44909 |                            |
| Kaladp0032s<br>0311.2 | 1451 | mdm-<br>miR172i_L+1R-1            | 3 | 0.44909 | RAP2.7,TOE1                |
| Kaladp0085s<br>0126.2 | 100  | nta-MIR168a-<br>p3_2ss1CA19G<br>C | 3 | 0.44909 |                            |
| Kaladp0020s<br>0210.2 | 1316 | gma-MIR5775-<br>p3_2ss9AC18GT     | 4 | 0.46247 |                            |
| Kaladp0048s<br>0514.7 | 376  | mdm-miR403a                       | 4 | 0.46247 | PSD                        |
| Kaladp0048s<br>0892.1 | 2564 | ath-MIR858a-<br>p5_1ss17AG        | 0 | 0.46398 |                            |
| Kaladp0023s<br>0084.1 | 297  | bol-MIR9410-<br>p3_2ss5TG18TA     | 2 | 0.46437 | HSL2                       |
| Kaladp0032s           | 977  | fve-                              | 2 | 0.46437 | AtGRF5,GRF5                |

|                       |      |                                 |   |         |                           |
|-----------------------|------|---------------------------------|---|---------|---------------------------|
| 0085.1                |      | miR396e_R+1_1<br>ss21TC         |   |         |                           |
| Kaladp0053s<br>0155.1 | 194  | gma-MIR5775-<br>p3_2ss9AC18GT   | 2 | 0.46437 |                           |
| Kaladp0021s<br>0108.2 | 1125 | kal-miR_C207                    | 2 | 0.46437 | ATWL4,CIPK12,SnRK3.9,WL4  |
| Kaladp0095s<br>0791.1 | 289  | kal-miR_C5376                   | 2 | 0.46437 | TBL34                     |
| Kaladp0081s<br>0257.1 | 1751 | kal-miR166a                     | 2 | 0.46437 | IFL,IFL1,REV              |
| Kaladp0093s<br>0040.2 | 2113 | kal-miR397d                     | 2 | 0.46437 |                           |
| Kaladp0003s<br>0134.4 | 992  | kal-miR858                      | 2 | 0.46437 |                           |
| Kaladp0746s<br>0002.1 | 865  | mdm-<br>miR156t_R-<br>1_1ss15AT | 2 | 0.46437 | SPL3                      |
| Kaladp0095s<br>0416.1 | 273  | mdm-miR162a                     | 2 | 0.46437 |                           |
| Kaladp0071s<br>0243.2 | 1752 | mdm-<br>miR172i_L+1R-1          | 2 | 0.46437 | RAP2.7,TOE1               |
| Kaladp0022s<br>0101.1 | 1025 | kal-miR_C450                    | 3 | 0.48865 | ATLCB1,EMB2779,FBR11,LCB1 |
| Kaladp0048s<br>0887.1 | 498  | kal-miR167a                     | 3 | 0.48865 |                           |
| Kaladp0023s<br>0025.1 | 877  | kal-miR169c                     | 3 | 0.48865 | ATHMA1,HMA1               |
| Kaladp0093s<br>0040.3 | 2279 | lja-miR397_L-<br>2R+2           | 3 | 0.48865 |                           |
| Kaladp0007s<br>0071.2 | 881  | lus-MIR399b-<br>p5_2ss6AG17AT   | 3 | 0.48865 |                           |
| Kaladp0051s<br>0086.1 | 404  | mdm-<br>miR168a_1ss2C<br>T      | 3 | 0.48865 |                           |
| Kaladp0042s<br>0159.1 | 334  | ppe-MIR171e-p5                  | 3 | 0.48865 | NQR                       |
| Kaladp0039s<br>0644.1 | 776  | kal-<br>miR_C516_star           | 4 | 0.49196 |                           |
| Kaladp0008s<br>0481.1 | 571  | kal-<br>miR397d_star            | 4 | 0.49196 |                           |
| Kaladp0024s<br>0978.1 | 202  | kal-<br>miR530a_star            | 4 | 0.49196 | FBA2                      |

[1] Gehrig H, GaußMann O, Marx H, Schwarzottb D, Klugeb M. **Molecular phylogeny of the genus Kalanchoe (Crassulaceae) inferred from nucleotide sequences of the ITS-1 and ITS-2 regions.** *Plant Science*, 2001, **160**(5):827-835.
